# Supplementary material
Source: PubMed Central journal article supplement (PMC4334144)
Supplement: supp_218.4.526_JEB110080.pdf [file supp_218.4.526_JEB110080.pdf]

**Fig. S1. Probe sequences for in situ hybridization.**

[Download Figure S1](#)

>NvErg1

TCACCGAACCTTCAGCCTGTAATACAACAAGGAAAGAGAGAGAAAGTTGCCAGGTTATGTCTTTAGG  
AGCGGATGTA  
ACCTGAATATAAGCTGCAAGCTCCTAACATCCATCCCTGGACTATTTTACATTACTCAGTGTTCAAAG  
CATTTTGGGACT  
GGCTATTCTCTTCTCGTCATTTACACGGCCATCGTCACTCCTTATATGGCGTCCTTTATCCTCACA  
CGTGACAAAATG  
CGGGACGAACTGAATAAAGACCCCGAACTCGGCGGGATTATGGTAGCGGAGCGCGGAGGTGTATAG  
TGATCCTCTAGT  
TATTCTAGATTATCTTGTGGACGTAATGTTTATTGTGGACATCTTTATTAATTTCCGGACCACATTTG  
TGGACAGTAACG  
ATGAGGTGGTGTGCGACCCCTTGCAGGATCGCGGTTTATTATTTAAGACTTGGTTTGTGATCGACCTG  
ATGGCCGCTATC  
CCATTTGAGCTTCTAATCATGGTTGGCAATACTGATGAGACCACGACGCTGATTGGTTTACTGAAGAC  
AGCCCGCCTACT  
TCGCCTTGTGCGGGTTGCGCGTAAGCTAGATCATTACTCGGAGTATGGCATGGCAGTGCTCTGTCTCC  
TGATGTGTTTAT  
TTGCGCTCTTGGCTCATTGGTTAGCCTGTATCTGGTACGCAATAGGCAATCTGGAGCGACAGCGAACC  
AATAGCACCCAT  
GGGTGGCTAGACGTCTTAGCAGAGCAAATTCACCGGCCCTTTGATGAGAAGGAGGTTGATAGCGGTCC  
CGATATAGAGTC  
CAAGTACATCACAGCACTGTACTTCACGTTAAGCAGCCTGACAAGCGTAGGCTTTGGGAACGTCTCTC  
CCAACACCAACG  
CAGAAAAGATCTTCTCCATTTGCGTCATGCTTATCGGGTCTCTGTTCTATGCCGCGATTTTCGGGAAC  
GTTGCGGCTATC  
ATCGCCCGACTCTACTCGAACACAGCTCGATACCATGCGCAGATGCAGAGAGTGCCTGAATTTATCCG  
CTTCCACCAGAT  
CCCTAACCTCTGAGACAGCGCATCGAAGACTACTCACACCATATATGGTCTTATACCAACGGCATCG  
ACATGGACCAGG  
TATTAGGGGGGTTTTCCAGAGTGTCTTCAAGCAGACATATGTCTGCACTTGAATGCCAATGTACTGACC  
ACATATCGAGCA  
TTCACCTCTGCGAGTCAAGGCTGCCTCCGCTCCCTGGCGCTCAAATGCGAACTACACACCTCCCCC  
TGGGGACTTTAT  
CATCTACCAAGGTGACGAGATCAGTCACCTCTACTTTCTCGTGAGAGGGACTGTTGAGGTGCTCAAAG  
ATGACACCATCA  
TGGCAATACTAGGAAAGGGGATAGCTTTCGGCGAAAACCTTCGGCCTTTTCGCCAAACCGCCCTCCTGGG  
AACTCACACGTC  
AGCATCCGGGCCCTCACGTAAGTGCATCTTTCGGGCTATATCGCGTGACGACCTTGTGAATACCATGCG  
CATGTACCCGAA  
TTTTCAGCAGACGTTCAACCAAGATTTAGAGATTACATATCTGTTAAGGGAACGCGAAGGAGCAGGCA  
GTACCAAGGAGC  
T

>NvErg2

atgacaagtttgaaggataaagtcttgacgtttctcttggaggaaaatatggtgATGGCGGCCTTCAA  
GAGATGGCGGGC  
ACGATACAAGAGATATAAGCTGCAAATCCCCCTCAAATGCGGAATCGCATAATTCTCCACTACGGAT  
TATTCAAGATAA  
CATGGGACTGGTTGATAATGGTTTTAGTGCTTTACACAGCCGTCGAAGTACCCTTTGTGTCAGCCTTT  
ATCATGTCTCAG  
GCTGACTTAAATAAAAGACTGAAACATCCTAATGTGACCGGGAACACATTTCGAGCGAATGAAGAAGTT  
GTACCCGGACGC  
CTACCCCTACTGCTGGTTGACACGTGTATAGACGTGATCTTCATGCTCGATATCGTGCTGAACTTTC  
GCACGACGTACG

TAAAGGAGGGCGAGGTGTTGATTACCAACCCTTGCAAGATAGGCATCCATTATCTGCGGTCGTACTTT  
ATCGTCGACTTC  
GTGGCGCAATACCATGGGAACTGTTGCTGGACCTCAATGCGGACGAGAATACTACTCTTTTCAGTCT  
TCTCAAGACGGC  
AAGGTTACTACGGCTGTTTCGGGCAGCGCGAAAACCTGGATCGAAACTACGAATACATGACGTCATTAC  
TATTTTTGATGT  
TGATGTTTTTCATGCTGGTCGCTCATTGGATGGCTTGTATCTGGTACATGATTGGTTTCTCAGAGCAG  
AAGCATAAACAG  
ACGTCCTGGCTCAGTATCCTAGCGACCGAGAGCAATAAACACTTCCACCCAACTGACCCCTGGAGCGG  
CCCCTACCTACC  
GTCACGATACCTAACGTCATTATATTACGTTATGACCTTATGCACTACTGTCGGGTTCCGAAATGTTT  
CGGCAAAATACCG  
ACGGCGAGAGGATATTCACGATATGTGGCATGCTACTCGGAGCGGTGATGTACGCCGGCATCTTTGGT  
AACGTGACTGCC  
ATCATTACGGCCAGTACTCTAGCAACTTCCGGTACCGC

>NvEag

ATGCCAGCAGGCAGACGAGGCCTCGTTGTACCTCAGAACAATTTTTCTGGAGAACATCGTACGACGGTC  
CAATGGCCTTCA  
TCCAATTTTTATCCTGGGTAACGCCAGATCCTTGGCAATCCTATTGTGTACGCGTCCGATGGCTTTT  
GCAAGCTGACTG  
GATTCTCACGAAGCGAGGTGATGAAGAAGAGCTCTGACTGCACCTTCCTTCACGGCGAGCACACAAGC  
AACGAGTCGATG  
AAGGAGATCCACGATGCACTGATCAATAAACAGGCGCTACAGTTAGAGATCATCATCTACAAGAAGGA  
CGGCTTGGCAAT  
GTGGGTACTGTGCATATCGGACCAATCGTCAACGAGAAGGGGGAGGTTGTGCTGTTCTTGATGACCA  
TCAAGGATATCA  
CCGAATACAAGGACCCAATCCCAGGCACAGatcaagGCGGCGCCAAAGGATGGGCTCGCTAAACAAG  
TCCCTACAAGA  
CATAAGACCGTACTGGTTGCGTTCAAGCAGAAGTCTGCGTCGCAGAAGAATGCGCAACAGATCACACA  
CCTGATGTCACT  
CAATGATGACATCATCCCTCAGTACAAGCAGGAGATACCGGAGACACCCCTCGTGTCATCCTACT  
ACAACACGTTCA  
AACTTCTGGGACTGGGTCATCCTGATTCTGACGCTCTACACAACAGTTTCCGTGCCTTTTATGGTT  
TGCTTCGCGTAC  
AATAGCGAACCCTAAACATTCTCGACATGATAGTGGATTGGCTGTTTCATAGCCGACATTGTGTTGAA  
CTTCCACACCAC  
ATACGTGGGTAAAGATGGCGAGATAATCGATGATCCCCGCTCATCCGATTGAATTATCTGAAAACGT  
GGTTCGTCCTTG  
ACTTGGTATCCTCTCTTCTTACGGCGTTCTTTATTTTATCCCAAATCCGAAATGGAACAAACGgag  
ATTGCAAACCTT  
TTGAGCTTCTTTCGTGCTTTTCGTCTTCTTCGTCTAGGCCGCGTCGCGCGCAAATCGACAAATATTT  
AGAGTACGGCGC  
TTCCACATTCTTCTCCTTATGCTCTCATTTTGTCTCGTTGCGCATTGGATGGCCTGCATGTTTTACG  
TCATTGCGACTA  
AATATGATAAATATGATGTACTGCTGGCTTTACATACTTGCTGATCAAATTGGCATGCAGTATAAG  
AAGAACGGCAAC  
TCCACAGAATATGACTATACTAATAACAGGGCCTACCATTGCTGCCGTTATGTGTCTGCGTTGTATTA  
CACACTTACAAG  
TCTCAGACAATCGGATTCGGGAATATATCCCCTAACACAACGGCGGAAAAGCTGTTTGGATGCGTTA  
CCATGCTGCTAG  
GATCGATTTTGTCTCGCTGATTTTTGGGCAAGTGTGCGGATCCTGCAGCAGTCCCAAAGAACA  
GCTAAATATCAC  
TCAATCATCGATAACATGCGGCAGTTCAGCAAGCTGTATAAGCTACCGTCCGTGTTAGCTGATAGAAT

TATAGACTACTT  
CATGTCAACTTGGGCGAGTAACAAGGGCATAGATACAGATGAGGTGCTCAAGTACTGCCCCAAGGACT  
TACAGGCGGACA  
TCTGTGTACATCTGAACCGCGTAGTCCTGGAGAATAATTTAGCCTTTTCGCGACGCACCAATGGGCGTC  
AAGCGTGCCATC  
GCAAGGAATTTCTGGATCTGTCACGTGGCACCTAACGATCGAATCATTTCATCACGGGGAAAGCCTGGA  
CGTTTTGTATTT  
CATCGCACGGGCTCACTCGAGGTCAAGCAGGGGGAAGCCGTTGTTGGGTTGCTAGGCGAAGGTGACG  
TATTTGGCGATA  
ACGTGTGCAATGAGCCACGGTTGGCCAATCAGCGGTGATGTACATGCGCTGACCTACTGTGACCTA  
CACTGCATTTCAG  
AGAGACGCTCTGCTTGAAGTGCTC

>NvE1k

GGGTTCTTAGTGCAATTACTCAAGTGTGGTCGCCTATTGCGCCTGTTTCGCGTCGTCCGAAAGCTTCA  
CCGGTATACGGA  
ATACAGCACAGTGTTACTCACGCTATTAATGTTAGCCTTTGCGATGGTCGCCCACTGGCTGGCATGTA  
TCTGGTATGTGA  
TTGGTCTAGAAGAAGTTAGCCACAACCTCCACCATTAGCTGGCTTTACCAGTTTGGCGAGACTATTCAG  
ATGCCTTTTATC  
GCATTCTCCCCGACACAGGACCGGACGAGGGCTCTGCTTACGTCCTGCGCTCTACTTCATTCTCAC  
AAGTATGACGAC  
TGTCGGTTTTCGGCAACGTGTGCGCTAACACCCGAGCTGAAAAGGCGTTTCGCGGTTGTCGTCATGTTAA  
TAGGAGCATTGA  
TGCACGCTGCTATCTTTGGCAACGTTGCTGCGATCATTGAGAAGCTATATGCAAACCGAGTGCGTTAT  
CATTCCCGCTCT  
AACGAGATCAAGCAGTTCATTTCGGGTTCCACCACATCGAGGCAGATCTTGCTAATAGGCTCGAGGACTG  
TTTTACACCAC  
ATGGTCGCTCTCAGGAGGAGTCGATACACGAGAGATATTGACGACGTTTCCGTACGAGCTCCAGGCTG  
ACGTCTGTATGC  
ATCTCTACCGAGGACTTCTCGATCTCCCGGTGTTTTCTCAAGCCCCGCGCGGCCTATTCCGGATGGTC  
TCGCTCAAGGTC  
AGCCCCGTCTATATCGGTCCTGGAGAATACCTGCTTACACAGAATGACGTCATCAACAGCATATATTA  
CATCGCCAGCGG  
GTCCATGGAGGTTCTTCAGGGCGAATCGGTTGCTGCAATATTAGGGAAAGGAGACTTATTTGGAGAGG  
ACATATCTCGCA  
AGTCACCGATTTCGCCGATCCAATGGTGACGTCAGGGCGCTGACGTACTGTGACGTGTATTACATCACA  
CGTGACAAGCTA  
CAGGAGGTGATGCACCTATATCCAGACTTCAGTTACAAGTTCAGCGAGAAGCTGGAGCTCACATACGA

**Table S1. Coding and amino acid sequences for *Mnemiopsis leidyi* EAG and *Nematostella vectensis* EAG.**

[Download Table S1](#)

**Table S2. Amino acid sequence data.**

[Download Table S2](#)
